# Using Pharmacokinetics to Optimize Antiretroviral Drug-Drug Interactions in the Treatment of Human Immunodeficiency Virus Infection

John G. Gerber

*From the Division of Clinical Pharmacology and Toxicology  
and Division of Infectious Diseases, University of Colorado  
Health Sciences Center, Denver*

**Better understanding of the pharmacokinetics of antiretroviral drugs has resulted in the design of combination therapies for the treatment of human immunodeficiency virus (HIV) infection. This has improved the bioavailability and prolonged the plasma half-life of some of the drugs, resulting in enhanced antiviral activity. However, antiviral combination therapy can also result in adverse drug-drug interactions and diminished antiretroviral activity. In this review, we examine drug interactions involving combinations of protease inhibitors, combinations of protease inhibitors with nonnucleoside reverse transcriptase inhibitors, and combinations of nucleoside analogues for the treatment of patients with HIV infection. We discuss examples and mechanisms of pharmacokinetic interactions that improve or decrease antiviral efficacy.**

The use of multidrug therapy for HIV infection makes it imperative to understand how antiretroviral drugs interact with one another. Antiretroviral drug combinations can result in pharmacokinetics that are favorable, unchanged, or adverse.

There are presently 14 antiretroviral drugs on the market. Six of them are nucleoside reverse transcriptase inhibitors (NRTIs): zidovudine, didanosine, stavudine, zalcitabine, lamivudine, and abacavir. Three are nonnucleoside reverse transcriptase inhibitors (NNRTIs): nevirapine, delavirdine, and efavirenz. Five are protease inhibitors (PIs): saquinavir, ritonavir, indinavir, nelfinavir, and amprenavir.

To understand how antiretroviral drugs interact with each other, a knowledge of their pharmacokinetics is an absolute necessity. Pharmacokinetics are simply what the body does to a drug when it is administered by any route. Pharmacokinetics for an orally administered drug include its absorption, first-pass metabolism, distribution, metabolism (either activation or inactivation), and elimination. Bioavailability is the term that defines the fraction of the drug that reaches the systemic circulation after oral administration. Low bioavailability can be the result of poor absorption as well as extensive first-pass metabolism.

For a drug to traverse the intestinal epithelial membrane, it must be in solution in the aqueous milieu of the gastrointestinal tract and be sufficiently lipophilic to pass through lipid membranes. The vast majority of antiretroviral drugs undergo passive diffusion through the gastrointestinal lining, driven by a

concentration gradient. Once in the intestinal epithelial cells, lipophilic drugs can be transported back to the luminal surface by the P-glycoprotein [1], a multidrug-resistance-transport protein, and/or metabolized by the intestinal cytochrome P450 (CYP) 3A isoenzymes [2]. The exact mechanisms by which the CYP enzymes interact with P-glycoprotein to adversely affect the bioavailability of drugs are currently unclear. It has been noted, however, that many drugs with a high affinity for CYP3A are also substrates for the P-glycoprotein [3]. Once in the portal circulation, drugs can be further metabolized by the liver before they reach the systemic circulation.

In the systemic circulation, drugs are distributed into tissues on the basis of their relative affinity for tissue components versus plasma components. Drugs with high affinity for tissue proteins have a large volume of distribution because of their preferential partitioning into tissues. Most lipophilic drugs are attracted to plasma proteins; therefore, plasma concentrations of drugs are a composite of both bound and free drugs. At steady state, the free drug is in equilibrium with the intracellular compartment as long as the drug enters the cells by simple diffusion and is not actively pumped out of the cytoplasm.

Therefore, total plasma concentration of a drug may be an underestimation of the actual concentration necessary for an effect. This has certainly been observed with the lipophilic HIV PIs. For example, the HIV PI SC-52151 becomes highly protein-bound, such that effective free concentrations are not achievable despite seemingly high total plasma concentrations [4]. It has been proposed that in the CNS, P-glycoprotein-mediated efflux in brain capillary endothelial cells inhibits the accumulation of HIV PIs at this site [5, 6].

Drugs in the systemic circulation are usually metabolized or excreted unchanged. Lipophilic drugs, such as PIs and NNRTIs, are oxidatively metabolized by the CYP enzymes to more polar forms for subsequent biliary or renal excretion. CYPs are a group of heme-containing membrane-bound en-

---

Reprints or correspondence: Dr. John G. Gerber, Professor of Medicine and Pharmacology, Divisions of Clinical Pharmacology and Infectious Diseases, University of Colorado Health Sciences Center, Box C-237, 4200 9th Ave., Denver, CO 80262.

**Clinical Infectious Diseases** 2000;30(Suppl 2):S123-9

© 2000 by the Infectious Diseases Society of America. All rights reserved.  
1058-4838/2000/3006S2-0004\$03.00

**Table 1.** Drug interactions of protease inhibitors used in combination.

| Drug combination         | Pharmacokinetic effect                                                                                                                                           | Virological outcome                                                            |
|--------------------------|------------------------------------------------------------------------------------------------------------------------------------------------------------------|--------------------------------------------------------------------------------|
| Ritonavir and saquinavir | Enhanced saquinavir exposure (20- to 50-fold); prolonged half-life of saquinavir; markedly lower dose of saquinavir to achieve high concentrations               | Enhanced and durable antiviral activity with twice-a-day dosing of both drugs  |
| Ritonavir and indinavir  | Enhanced indinavir exposure (3- to 5-fold); prolonged half-life of indinavir; lower indinavir dose with higher $C_{min}$ ; no dietary restriction with indinavir | Short-term antiviral effect is excellent with twice-a-day dosing of both drugs |
| Ritonavir and nelfinavir | Enhanced nelfinavir exposure (~2-fold); increased generation of active metabolite, AG1402                                                                        | Excessive diarrhea; inconclusive virological data                              |

NOTE.  $C_{min}$ , minimal concentration of drug.

zymes that are involved in a host of mono-oxygenase reactions. This family of enzymes is involved in steroid and fatty acid oxidation. Only a handful of CYP isozymes are involved in drug metabolism. They catalyze reactions to increase the water solubility of lipophilic drugs to facilitate elimination. The liver contains the highest quantity and the most diverse isoforms of CYP enzymes. Other cells, including small-bowel epithelial cells and renal tubular cells, also contain CYPs that contribute to drug metabolism [7, 8].

The main drug-metabolizing enzymes are CYP3A4, 2C9, 2C19, 2D6, 1A2, 2E1, 2B6, and 2A6. In both the liver and small intestine, CYP3A4 is the most abundant CYP isozyme present. Frequently, drugs are metabolized by multiple CYP isozymes, but usually 1 isozyme predominates in their biotransformation. PIs are large lipophilic molecules that appear to have an affinity for CYP3A4, which mediates their metabolism. The PIs can also inhibit CYP3A4 activity, impeding the biotransformation of other drugs that use this isozyme for metabolism [9]. If the concomitant drug has a low therapeutic index, excessive accumulation can produce severe toxicity.

Of the PIs in clinical use, ritonavir is the most potent inhibitor of CYP3A4; indinavir, nelfinavir, and amprenavir are less potent by an order of magnitude, and saquinavir is the least potent [10]. In addition to inhibition of CYP3A4, both ritonavir and nelfinavir induce the activity of CYP3A4 and other microsomal enzymes, resulting in rather complex drug-drug interactions. Ritonavir is partly metabolized by CYP2D6, and it has been demonstrated to inhibit this isozyme as well [11]. Partial metabolism of nelfinavir by the CYP2C19 isozyme results in the formation of its active metabolite, referred to as M8 or AG-1402 [12].

Delavirdine, an NNRTI, is metabolized mainly by CYP3A4 and is an inhibitor of this isozyme as well. Both nevirapine and efavirenz are inducers of CYP3A4 activity, but most of their metabolism appears to be mediated by another CYP isozyme, CYP2B6 [13].

NRTIs are water-soluble and, with the exception of zidovudine, are mostly eliminated by renal excretion. Zidovudine is conjugated by glucuronidation, and the conjugate is renally eliminated. NRTIs are prodrugs that require intracellular phos-

phorylation for activity, and drug-drug interactions that affect phosphorylation can affect drug activity.

The following paragraphs will describe some of the important drug-drug interactions that may occur with the use of combinations of PIs, combinations of PIs and NNRTIs, and combinations of NRTIs. The description of the interactions through the inhibition or induction of CYP isozymes is based on mean changes in the pharmacokinetic parameters. The organ-specific expression of the CYP isozymes across the population is large. Therefore, the usual dosing of these drugs can result in variable concentrations at steady state, with some subjects having high and potentially toxic levels and others having low levels that are potentially inadequate to suppress the virus. The issue of therapeutic drug monitoring of antiretroviral agents is reviewed in this supplement by Acosta et al. [14]. Pharmacodynamic interactions of these drug combinations that enhance or diminish their activity is outside the scope of this review.

### Drug-Drug Interactions of PIs Used in Combination

Saquinavir was the first PI marketed in the United States and was formulated in a hard-gel capsule as a mesylate salt (Invirase; Hoffman-La Roche, Nutley, NJ). This drug has very unfavorable pharmacokinetics: even in combination therapy with NRTIs, its efficacy has been very limited because of the low and variable plasma concentrations that have been achieved. Administration of high doses of Invirase [15] and the new soft-gel formulation [16] has resulted in enhanced antiretroviral activity. The pharmacokinetics of saquinavir were also markedly improved when it was combined with ritonavir [17] (table 1). Saquinavir has very low oral bioavailability, which is probably secondary to its metabolism by intestinal CYP3A4 and its affinity for the P-glycoprotein [18]. In addition, the drug has a very short half-life because of high systemic clearance.

Administration of ritonavir was found to enhance the bioavailability and prolong the elimination half-life of saquinavir, such that the plasma-concentration time/area under the curve (AUC) of saquinavir increased as much as 30- to 50-fold compared with that of saquinavir alone [19]. This combination reduces the pill burden and the cost of antiretroviral therapy.

Ritonavir may inhibit both intestinal and hepatic CYP3A4 and thus improve the bioavailability of saquinavir by decreasing its systemic clearance. The combination of ritonavir and saquinavir (400 mg/400 mg) appears to have extremely potent antiretroviral activity, judged on the basis of the documented durable responses observed in patients [20]. It is unclear how much ritonavir contributes to the antiviral effect of the high concentration of saquinavir. This is an important question, because ritonavir is poorly tolerated at high doses. However, there are only limited pharmacokinetic data on single low doses of ritonavir with saquinavir.

In healthy volunteers, ritonavir increases saquinavir exposure in a dose-dependent manner [17]. More important, there are no efficacy data on low-dose ritonavir combined with saquinavir. Lower and better-tolerated doses of ritonavir may make this combination more attractive as therapy. However, before a lower dose of ritonavir can be recommended for use with saquinavir, we need comparative efficacy data from studies with adequately large sample sizes.

Indinavir is a potent and relatively well-tolerated PI. The drug has some pharmacokinetic advantages over the other PIs but many disadvantages as well. The main advantage is that only 60% of indinavir is protein-bound in the circulation. At steady state, the total plasma concentration of the drug therefore may more closely reflect the diffused intracellular concentration, which is important for its antiretroviral effects [21]. However, the drug has numerous pharmacokinetic disadvantages. Indinavir has to be taken on an empty stomach or with a low-fat snack [22]. The drug has a very short half-life because of the high systemic clearance; therefore the present recommended dose is 800 mg every 8 h.

Because of the large variability in both bioavailability and systemic clearance, the trough concentration of indinavir can vary widely across a patient population and sometimes can fall significantly below the 95% inhibitory concentration [23]. In addition, because of the rigid dosing schedule and the dietary requirement for maximal absorption, drug adherence can be difficult. Inadequate plasma concentrations of indinavir may promote the evolution of PI-resistant strains of HIV. Indinavir is also the only PI with significant renal excretion [24]. Since the drug has limited water solubility, especially at higher urinary pH, a significant proportion of patients who take indinavir may develop nephrolithiasis. It has been shown that the urinary concentration of indinavir directly correlates with its plasma concentration; thus, during the first 3–4 h after drug administration, the urine becomes supersaturated with indinavir [22].

The administration of ritonavir improves the bioavailability and prolongs the elimination half-life of indinavir, and it reduces the total dose necessary to achieve a potent antiretroviral plasma concentration. There are accumulating and encouraging clinical data concerning the combination of ritonavir and indinavir. The pharmacokinetic interaction study findings in normal volunteers were very positive [25]. Ritonavir (400 mg twice

daily) decreases the systemic clearance and improves the oral bioavailability of indinavir to the point that a lower dose of indinavir (400 mg twice daily) results in the same drug exposure as a high dose (e.g., 800 mg every 8 h). The trough concentration of indinavir is also consistently higher with the ritonavir/indinavir combination than with indinavir alone. Most surprising is that food does not affect the bioavailability of indinavir when it is administered with ritonavir [26]. With the lower peak concentration of indinavir resulting from administration of the lower dose, the incidence of renal stone formation may be reduced.

Recently, pharmacokinetic data were presented about variable dosage combinations of indinavir and ritonavir. Burger et al. [27] treated antiretroviral-naïve, HIV-infected patients with a combination of indinavir (800 mg) and ritonavir (100 mg) b.i.d. and found that the trough concentration of indinavir was 4-fold higher than with the regimen of indinavir alone, 800 mg every 8 h. This combination was well tolerated and was significantly less expensive because fewer pills were administered. Saah et al. [28] administered varying dosage combinations of indinavir and ritonavir to healthy volunteers. They found that ritonavir had a favorable and dose-dependent effect on indinavir pharmacokinetics. At a dosage combination of 800 mg of indinavir and 200 mg of ritonavir b.i.d., the trough concentration of indinavir was very high.

Efficacy and toxicity data are urgently needed concerning this unique PI dosage combination. The only clinical data on a combination of these PIs (at a dose of 400 mg/400 mg) with 2 NRTIs have been presented by Workman et al. [29] and Rockstroh et al. [30] and demonstrated excellent antiviral efficacy in PI-naïve patients. These data, however, should be interpreted with caution since these were not comparative trials and indinavir with 2 NRTIs can be a very potent antiretroviral drug combination.

There are some data on the pharmacokinetics of nelfinavir in combination with ritonavir. Since both ritonavir and nelfinavir are potent inducers of microsomal drug-metabolizing enzymes, it is important they be at steady state when drug-drug interactions between these PIs are evaluated. It usually takes 10–14 days to maximally induce metabolism of these drugs. In normal volunteers, ritonavir has been shown to increase nelfinavir exposure 2-fold to 3-fold. Flexner et al. [31] examined the effect of ritonavir (400 mg twice daily) on the kinetics of 2 doses of nelfinavir and its active metabolite, M8 (AG-1402), in HIV-infected patients. Using historical controls for comparisons, they found that ritonavir increased nelfinavir exposure approximately 2-fold but increased the generation of M8 3- to 4-fold.

These data suggest that the inductive effect of ritonavir on CYP2C19 may be substantially greater than its inhibitory activity. Although clinical data were difficult to interpret because of an inadequate sample size, this combination does not appear

**Table 2.** Drug interactions of protease inhibitors in combination with nonnucleoside reverse transcriptase inhibitors (NNRTIs).

| Drug combination          | Pharmacokinetic effect                                                                                                   | Virological outcome                                                                                         |
|---------------------------|--------------------------------------------------------------------------------------------------------------------------|-------------------------------------------------------------------------------------------------------------|
| Delavirdine and indinavir | Increased indinavir exposure (~50%), resulting in lower dose of indinavir                                                | Mostly uncontrolled studies, but appeared to have some efficacy for salvage therapy after multidrug failure |
| Nevirapine and indinavir  | Decreased indinavir exposure (~30%) but diminished variability in $C_{min}$ ; increased dose of indinavir is recommended | Excellent antiretroviral effect                                                                             |
| Nevirapine and nelfinavir | No change in kinetics of either drug                                                                                     | Excellent antiretroviral effect                                                                             |
| Efavirenz and indinavir   | Decreased indinavir exposure (~30%); increased dose of indinavir is recommended                                          | Excellent and durable antiretroviral effect                                                                 |

NOTE.  $C_{min}$ , minimal concentration of drug.

to be as efficacious as either ritonavir/saquinavir or ritonavir/indinavir [32].

Other combinations of PIs have not yielded sufficient clinical or pharmacokinetic data for full interpretation. However, nelfinavir clearly has been found to increase the exposure of saquinavir, but to a lesser degree than ritonavir does [33].

### Drug-Drug Interactions of PIs and NNRTIs

The combination of PIs and NNRTIs (table 2) is attractive because both groups of drugs have potent antiretroviral efficacy and they are not antagonistic. Of the NNRTIs, delavirdine is the largest by molecular weight, and it has been used extensively in clinical trials. Delavirdine is metabolized by multiple CYPs, but it inhibits CYP3A4 significantly [34]. Delavirdine inhibits the metabolism of the PIs, thereby increasing the AUC of indinavir, ritonavir, and nelfinavir by 50%–80%. It notably increases saquinavir exposure, by >400% [35, 36]. The dose of indinavir is recommended to be reduced to 600 mg every 8 h because of the inhibitory effect of delavirdine. Indinavir, saquinavir, and ritonavir do not affect the kinetics of delavirdine metabolism [37]. In contrast, both rifampin and rifabutin, potent inducers of CYP3A4 and 2C9, stimulate the metabolism of delavirdine, suggesting the involvement of CYP3A4 and CYP2C9 [38, 39]. Since ritonavir inhibits CYP3A4 and likely induces CYP2C9, the combined effect of these activities may not alter the pharmacokinetics of delavirdine.

In contrast, nelfinavir decreases the AUC of delavirdine by 50% [40]. This effect is probably secondary to the ability of nelfinavir to induce the activity of multiple microsomal enzymes. Large clinical trials with this drug combination have been limited, but the report of an uncontrolled study suggested that the combination of indinavir or nelfinavir with delavirdine has antiviral efficacy in patients for whom other antiretroviral drugs have failed [41].

Of the antiretroviral drugs, nevirapine and efavirenz have favorable pharmacokinetics because of their long plasma half-life. The weakness of all of the NNRTIs as antiretroviral drugs, however, is that HIV rapidly develops resistance to these agents.

Nevirapine has a small molecular weight, predictably good bioavailability, and because of its low hepatic clearance, a long half-life [42]. Protein binding is only 60%, and the drug distributes to multiple sites, including the CNS [43]. Hepatic metabolism of nevirapine is mainly through the activity of CYP2B6 and CYP3A4. Nevirapine induces its own metabolism by activating both CYP2B6 and CYP3A4. The induction of these enzymes appears to result in an interaction of nevirapine with PIs, since the AUCs of both indinavir and saquinavir are decreased by nevirapine by ~28% [44, 45].

In the presence of nevirapine, therefore, the present recommendation is to increase the dose of indinavir to 1000 mg every 8 h. Nevirapine has no significant effect on the pharmacokinetics of either ritonavir or nelfinavir, perhaps because these drugs induce their own metabolism [46]. No PI has a significant effect on the pharmacokinetics of nevirapine, a circumstance suggesting that CYP3A4 does not have a major role in the metabolism of nevirapine. Data from clinical trials with the combination of PIs and nevirapine indicate this combination to be potent [47, 48].

Efavirenz is the latest of the NNRTIs to be approved by the US Food and Drug Administration for clinical use (September 1998). It is the most potent of the NNRTIs and has shown remarkable efficacy when combined with 2 NRTIs [49]. When efavirenz is combined with indinavir, it also causes a potent and durable antiretroviral effect [50]. Efavirenz has favorable pharmacokinetics. It is efficiently absorbed and has a very long half-life; therefore, once-a-day administration is recommended. The drug is metabolized in the liver mainly by CYP2B6 and CYP3A4.

Like nevirapine, efavirenz also induces its own metabolism. Induction of CYP3A4 by efavirenz results in enhanced metabolism of indinavir, saquinavir, and amprenavir. In clinical trials, the dose of indinavir has been increased to 1000 mg every 8 h to compensate for the ~30% decrease of the AUC when the drug is combined with efavirenz [51]. Efavirenz has a greater effect on the metabolism of saquinavir than on that of indinavir, so it is not currently recommended for use with saquinavir.

In addition to stimulating CYP3A4, efavirenz inhibits

**Table 3.** Drug interactions of nucleoside reverse transcriptase inhibitors used in combination.

| Drug combination           | Pharmacokinetic effect                                | Virological outcome                                            |
|----------------------------|-------------------------------------------------------|----------------------------------------------------------------|
| Stavudine and zidovudine   | Decreased intracellular phosphorylation of stavudine  | Loss of stavudine activity; the combination should not be used |
| Lamivudine and zalcitabine | Decreased intracellular phosphorylation of lamivudine | No data; the combination probably should not be used           |
| Didanosine and hydroxyurea | Increased phosphorylation of dideoxyadenosine         | Enhanced antiviral activity                                    |

CYP2C19. Therefore, the combination of efavirenz and nelfinavir may cause a small but significant increase in the AUC of nelfinavir and a significant decrease in the formation of its active metabolite, M8 [12]. Efavirenz also slightly but significantly increases ritonavir exposure. The effect of the PIs on efavirenz pharmacokinetics has generally been found to be insignificant, although recently it has been reported that the AUC of efavirenz increases slightly when it is combined with ritonavir [52].

Finally, the importance of pathways for efavirenz metabolism, other than those mediated by CYP3A4, have been suggested by data showing that rifampin decreased efavirenz exposure inconsistently and only to a minor extent [53].

### Drug-Drug Interactions of NRTIs Used in Combination

For the NRTIs, adverse or favorable drug interactions occur at the level of phosphorylation. All of the NRTIs are prodrugs that require activation by 3 cellular phosphorylation steps to form a triphosphate derivative, which then competes with endogenous nucleotides for viral reverse transcriptase. With the use of multiple NRTIs in the clinical treatment of HIV infection (table 3), it is important to understand how these drugs interact at the level of intracellular phosphorylation.

Stavudine and zidovudine are thymidine analogues that share intracellular phosphorylation pathways. In addition, zidovudine monophosphate accumulates in cells in high concentrations because of its ability to inhibit thymidylate kinase, thereby slowing further phosphorylation [54]. Stavudine, in the presence of zidovudine, is very poorly phosphorylated, probably because it does not compete effectively with zidovudine at the thymidine kinase step, and further phosphorylation is slowed by the inhibition of thymidylate kinase by zidovudine monophosphate [55]. Clinical evaluation of the combination of stavudine and zidovudine administered to patients who had previously received zidovudine therapy was conducted in AIDS Clinical Trials Group (ACTG) 290. That study demonstrated that the virological outcome for patients receiving both drugs was poorer than the outcome for patients receiving stavudine alone [56].

Zalcitabine and lamivudine, both cytosine analogues, use the same phosphorylation pathways and adversely affect the phosphorylation of each other in vitro [57]. Since zalcitabine is given to patients only infrequently, clinical correlations of these in vitro adverse drug-drug interactions have not been reported.

However, these 2 drugs should not be used together to treat HIV infection.

Finally, hydroxyurea, a ribonucleotide reductase inhibitor, improves the phosphorylation and the activity of numerous NRTIs, most prominently didanosine [58, 59]. The use of hydroxyurea has been shown in clinical trials to improve the efficacy of didanosine administered with stavudine [60].

In summary, with the use of multiple antiretroviral drugs for the treatment of HIV infection, it is critical to understand their pharmacokinetic interactions so that favorable effects are optimized and adverse ones avoided. This review has discussed examples of both types of interactions in the multidrug treatment of HIV infection.

### References

1. Gatmaitan ZC, Arias IM. Structure and function of P-glycoprotein in normal liver and small intestine. *Adv Pharmacol* **1993**;24:77-97.
2. Kivistö KT, Bookjans G, Fromm MF, Griese EU, Munzel P, Kroemer HK. Expression of CYP3A4, CYP3A5, and CYP3A7 in human duodenal tissue. *Br J Clin Pharmacol* **1996**;42:387-9.
3. Wachter VJ, Wu CY, Benet LZ. Overlapping substrate specificities and tissue distribution of cytochrome P450 3A and P-glycoprotein: implications for drug delivery and activity in cancer chemotherapy. *Mol Carcinog* **1995**;13:129-34.
4. Fischl MA, Richman DD, Flexner C, et al. Phase I/II study of the toxicity, pharmacokinetics, and activity of the HIV protease inhibitor SC-52151. *J Acquir Immune Defic Syndr Hum Retrovirol* **1997**;15:28-34.
5. van Asperen J, Mayer U, van Tellingen O, Beijnen JH. The functional role of P-glycoprotein in the blood-brain barrier. *J Pharm Sci* **1997**;86:881-4.
6. Kim RB, Fromm MF, Wandel C, et al. The drug transporter P-glycoprotein limits oral absorption and brain entry of HIV-1 protease inhibitors. *J Clin Invest* **1998**;101:289-94.
7. Paine MF, Khalighi M, Fisher JM, et al. Characterization of interintestinal and intraintestinal variations in human CYP3A-dependent metabolism. *J Pharmacol Exp Ther* **1997**;283:1552-62.
8. Haehner BD, Gorski JC, Vandenbranden M, et al. Bimodal distribution of renal cytochrome P450 3A activity in humans. *Mol Pharmacol* **1996**;50:52-9.
9. Flexner C. HIV-protease inhibitors. *N Engl J Med* **1998**;338:1281-92.
10. Eagling VA, Back DJ, Barry MG. Differential inhibition of cytochrome P450 isoforms by the protease inhibitors ritonavir, saquinavir, and indinavir. *Br J Clin Pharmacol* **1997**;44:190-4.
11. Kumar GN, Rodrigues AD, Buko AM, Denissen JF. Cytochrome P450-mediated metabolism of the HIV-1 protease inhibitor ritonavir (ABT-538) in human liver microsomes. *J Pharmacol Exp Ther* **1996**;277:423-31.
12. Fiske WD, Benedek IH, White SJ, et al. Pharmacokinetic interaction between efavirenz and nelfinavir mesylate in healthy volunteers [abstract 349]. In: Program and abstracts of the 5th Conference on Retroviruses and Op-

- portunistic Infections (Chicago). Alexandria, VA: Foundation for Retrovirology and Human Health, **1998**:144.
13. Fiske WD, Benedek IH, White SJ, et al. Pharmacokinetic interaction between DMP-266 and nelfinavir mesylate in healthy volunteers [abstract I-174]. In: Program and abstracts of the 37th Interscience Conference on Antimicrobial Agents and Chemotherapy (Toronto). Washington, DC: American Society for Microbiology, **1997**:275.
  14. Acosta EP, Kakuda TN, Brundage RC, Anderson PL, Fletcher CV. Pharmacodynamics of human immunodeficiency virus type 1 protease inhibitors. *Clin Infect Dis* **2000**; 30(Suppl 2):S151-9 (in this issue).
  15. Schapiro JM, Winters MA, Stewart F, et al. The effect of high-dose saquinavir on viral load and CD4<sup>+</sup> T-cell counts in HIV-infected patients. *Ann Intern Med* **1996**; 124:1039-50.
  16. Boucher CA, Borleffs J. Long-term evaluation of saquinavir soft-gel capsule or indinavir as part of combination triple therapy (CHEESE study) [abstract 12267]. In: Conference record of the 12th World AIDS Conference. Geneva: Marathon Multimedia, **1998**:65.
  17. Hsu A, Granneman GR, Cao G, et al. Pharmacokinetic interactions between two human immunodeficiency virus protease inhibitors, ritonavir and saquinavir. *Clin Pharmacol Ther* **1998**; 63:453-64.
  18. Lee CG, Gottesman MM, Cardarelli CO, et al. HIV-1 protease inhibitors are substrates for the MDR1 multidrug transporter. *Biochemistry* **1998**; 37:3594-601.
  19. Merry C, Barry MG, Mulcahy FM, et al. Saquinavir pharmacokinetics alone and in combination with ritonavir in HIV-1-infected patients. *AIDS* **1997**; 11:F29-33.
  20. Cameron DW, Japour AJ, Xu Y, et al. Ritonavir and saquinavir combination therapy for the treatment of HIV infection. *AIDS* **1999**; 13:213-24.
  21. Lazdins JK, Mestan J, Goutte G, et al. In vitro effect of  $\alpha$ 1-acid glycoprotein on the anti-human immunodeficiency virus (HIV) activity of the protease inhibitor CGP 61755: a comparative study with other relevant HIV protease inhibitors. *J Infect Dis* **1997**; 175:1063-70.
  22. Yeh KC, Deutsch PJ, Haddix H, et al. Single-dose pharmacokinetics of indinavir and the effect of food. *Antimicrob Agents Chemother* **1998**; 42:332-8.
  23. Acosta EP, Henry K, Weller D, et al. Indinavir pharmacokinetics and relationship between exposure and antiviral effect [abstract A-15]. In: Program and abstracts of the 37th Interscience Conference on Antimicrobial Agents and Chemotherapy (Toronto). Washington, DC: American Society for Microbiology, **1997**:3.
  24. Balani SK, Woolf EJ, Hoagland VL, et al. Disposition of indinavir, a potent HIV-1 protease inhibitor, after an oral dose in humans. *Drug Metab Dispos* **1996**; 24:1389-94.
  25. Hsu A, Granneman GR, Japour A, et al. Evaluation of potential ritonavir and indinavir combination BID regimens [abstract A-57]. In: Program and abstracts of the 37th Interscience Conference on Antimicrobial Agents and Chemotherapy (Toronto). Washington, DC: American Society for Microbiology, **1997**:12.
  26. Hsu A, Granneman R, Heath-Chiozzi M, et al. Indinavir can be taken with regular meals when administered with ritonavir [abstract 22361]. In: Conference record of the 12th World AIDS Conference. Geneva: Marathon Multimedia, **1998**:336.
  27. Burger DM, Hugen PWH, Prins JM, Van de Ende ME, Reiss P, Lange JMA. Pharmacokinetics of an indinavir/ritonavir 800/100 mg bid regimen [abstract 363]. In: Programs and abstracts of the 6th Conference on Retroviruses and Opportunistic Infections (Chicago). Alexandria, VA: Foundation for Retrovirology and Human Health, **1999**:136.
  28. Saah AJ, Winchell G, Seniuk M, Deutsch P. Multiple-dose pharmacokinetics and tolerability of indinavir-ritonavir combinations in healthy volunteers [abstract 362]. In: Programs and abstracts of the 6th Conference on Retroviruses and Opportunistic Infections (Chicago). Alexandria, VA: Foundation for Retrovirology and Human Health, **1999**:136.
  29. Workman C, Musson R, Dyer W, Sullivan J. Novel double protease combinations combining indinavir with ritonavir: results from first study [abstract 22372]. In: Conference record of the 12th World AIDS Conference. Geneva: Marathon Multimedia, **1998**:338.
  30. Rockstroh JK, Bergmann F, Wiesel W, Rieke A, Nadler M, Knechten H. Efficacy and safety of BID firstline ritonavir/indinavir plus double nucleoside combination therapy in HIV-infected individuals [abstract 631]. In: Program and abstracts of the 6th Conference on Retroviruses and Opportunistic Infections (Chicago). Alexandria, VA: Foundation for Retrovirology and Human Health, **1999**:186.
  31. Flexner C, Hsu A, Kerr B, et al. Steady-state pharmacokinetic interactions between ritonavir, nelfinavir, and the nelfinavir active metabolite M8 (AG1402) [abstract 42265]. In: Conference record of the 12th World AIDS Conference. Geneva: Marathon Multimedia, **1998**:826.
  32. Gallant J, Heath-Chiozzi M, Anderson R, Fields C, Flexner C. Phase II study of ritonavir-nelfinavir combination therapy: an update [abstract 12207]. In: Conference record of the 12th World AIDS Conference. Geneva: Marathon Multimedia, **1998**:52.
  33. Merry C, Barry MG, Mulcahy FM, et al. Saquinavir pharmacokinetics alone and in combination with nelfinavir in HIV-infected patients. *AIDS* **1997**; 11:F117-20.
  34. Cheng C-L, Smith DE, Carver PL, et al. Steady-state pharmacokinetics of delavirdine in HIV-positive patients: effect on erythromycin breath test. *Clin Pharmacol Ther* **1997**; 61:531-43.
  35. Cox SR, Ferry JJ, Batts DH, et al. Delavirdine and marketed protease inhibitors: pharmacokinetic interaction studies in healthy volunteers [abstract 372]. In: Program and abstracts of the 4th Conference on Retroviruses and Opportunistic Infections (Washington, DC). Alexandria, VA: Foundation for Retrovirology and Human Health, **1997**:133.
  36. Morse GD, Shelton MJ, Hewitt RG, et al. Ritonavir pharmacokinetics during combination therapy with delavirdine [abstract 343]. In: Program and abstracts of the 5th Conference on Retroviruses and Opportunistic Infections (Chicago). Alexandria, VA: Foundation for Retrovirology and Human Health, **1998**:143.
  37. Shelton MJ, Hewitt RG, Adams JM. Delavirdine mesylate pharmacokinetics during combination therapy with ritonavir [abstract A-63]. In: Program and abstracts of the 37th Interscience Conference on Antimicrobial Agents and Chemotherapy (Toronto). Washington, DC: American Society for Microbiology, **1997**:13.
  38. Borin MT, Chambers JH, Carel BJ, Gagnon S, Freimuth WW. Pharmacokinetic study of the interaction between rifampin and delavirdine mesylate. *Clin Pharmacol Ther* **1997**; 61:544-53.
  39. Borin MT, Chambers JH, Carel BJ, Freimuth WW, Aksentjevich S, Piergies AA. Pharmacokinetic study of the interaction between rifabutin and delavirdine mesylate in HIV-1 infected patients. *Antiviral Res* **1997**; 35:53-63.
  40. Cox SR, Schneck DW, Herman BD, et al. Delavirdine and nelfinavir: a pharmacokinetic drug-drug interaction study in healthy adult volunteers [abstract 345]. In: Program and abstracts of the 5th Conference on Retroviruses and Opportunistic Infections (Chicago). Alexandria, VA: Foundation for Retrovirology and Human Health, **1998**:144.
  41. Lyle L, Strebel G. Effect of nelfinavir/indinavir/delavirdine in HIV<sup>+</sup> patients with extensive antiviral experience [abstract 12329]. In: Conference record of the 12th World AIDS Conference. Geneva: Marathon Multimedia, **1998**:79.
  42. Havlir D, Cheeseman SH, McLaughlin M, et al. High-dose nevirapine: safety, pharmacokinetics, and antiviral effect in patients with human immunodeficiency virus infection. *J Infect Dis* **1995**; 171:537-45.
  43. Glynn SL, Yazdanian M. In vitro blood-brain barrier permeability of nevirapine compared to other HIV antiretroviral agents. *J Pharm Sci* **1998**; 87:306-10.
  44. Murphy R, Gagnier P, Lamson M, et al. Effect of nevirapine on pharmacokinetics of indinavir and ritonavir in HIV-1 patients. In: Program and abstracts of the 4th Conference on Retroviruses and Opportunistic In-

- fections (Washington, DC). Alexandria, VA: Foundation for Retrovirology and Human Health, **1997**.
45. Sahai J, Cameron W, Salgo M, et al. Drug interaction study between saquinavir and nevirapine [abstract 614]. In: Program and abstracts of the 4th Conference on Retroviruses and Opportunistic Infections (Washington, DC). Alexandria, VA: Foundation for Retrovirology and Human Health, **1997**:178.
46. Skowron G, Leoung G, Dusek A, et al. Stavudine, nelfinavir and nevirapine. Preliminary safety, activity and pharmacokinetic interactions [abstract 350]. In: Program and abstracts of the 5th Conference on Retroviruses and Opportunistic Infections (Chicago). Alexandria, VA: Foundation for Retrovirology and Human Health, **1998**:145.
47. Harris M, Durakovic C, Rae S, et al. A pilot study of nevirapine, indinavir, and lamivudine among patients with advanced human immunodeficiency virus disease who have had failure of combination nucleoside therapy. *J Infect Dis* **1998**; 177:1514–20.
48. Skowron G, Leoung G, Berman Y-L, et al. Stavudine, nelfinavir and nevirapine: suppression of HIV-1 RNA to fewer than 50 copies/ml during 5 months of therapy [abstract 12275]. In: Conference record of the 12th World AIDS Conference. Geneva: Marathon Multimedia, **1998**:67.
49. Staszewski S, Morales-Ramirez J, Flanigan T, et al. A phase II, multicenter, randomized, open-label study to compare the antiretroviral activity and tolerability of efavirenz (EFV) + indinavir (IDV) versus EFV + zidovudine (ZDV) + lamivudine (3TC), versus IDV + ZDV + 3TC at 24 weeks (DMP266-006) [abstract 22336]. In: Conference record of the 12th World AIDS Conference. Geneva: Marathon Multimedia, **1998**:330.
50. Riddler S, Kahn J, Hicks C, et al. Durable clinical anti-HIV-1 activity (72 weeks) and tolerability of efavirenz (DMP266) in combination with indinavir (DMP266-003, cohort IV) [abstract 12359]. In: Conference record of the 12th World AIDS Conference. Geneva: Marathon Multimedia, **1998**:85.
51. Fiske WD, Mayers D, Wagner K, et al. Pharmacokinetics of DMP 266 and indinavir multiple oral doses in HIV-1-infected individuals [abstract 568]. In: Program and abstracts of the 4th Conference on Retroviruses and Opportunistic Infections (Washington, DC). Alexandria, VA: Foundation for Retrovirology and Human Health, **1997**:169.
52. Fiske W, Benedek IH, Joseph JL, et al. Pharmacokinetics of efavirenz and ritonavir after multiple oral doses in healthy volunteers [abstract 42269]. In: Conference record of the 12th World AIDS Conference. Geneva: Marathon Multimedia, **1998**:827.
53. Benedek I, Joshi A, Fiske WD, et al. Pharmacokinetic interaction between efavirenz and rifampin in healthy volunteers [abstract 42280]. In: Conference record of the 12th World AIDS Conference. Geneva: Marathon Multimedia, **1998**:829.
54. Lavie A, Schlichting I, Vetter IR, Konrad M, Reinstein J, Goody RS. The bottleneck in AZT activation. *Nat Med* **1997**; 3:922–4.
55. Hoggard PG, Kewn S, Barry MG, Khoo SH, Back DJ. Effects of drugs on 2',3'-dideoxy-2',3'-didehydrothymidine phosphorylation in vitro. *Antimicrob Agents Chemother* **1997**; 41:1231–6.
56. Havlir DV, Friedland G, Pollard G, et al. Combination zidovudine and stavudine therapy versus other nucleosides: report of two randomized trials (ACTG 290 and 298) [abstract 2]. In: Program and abstracts of the 5th Conference on Retroviruses and Opportunistic Infections (Chicago). Alexandria, VA: Foundation for Retrovirology and Human Health, **1998**.
57. Kewn S, Veal GJ, Hoggard PG, Barry MG, Back DJ. Lamivudine (3TC) phosphorylation and drug interactions in vitro. *Biochem Pharmacol* **1997**; 54:589–95.
58. Palmer S, Cox S. Increased activation of the combination of 3'-azido-3'-deoxythymidine and 2'-deoxy-3'-thiacytidine in the presence of hydroxyurea. *Antimicrob Agents Chemother* **1997**; 41:460–4.
59. Rana KZ, Simmons KA, Dudley MN. Reduction of the IC<sub>50</sub> of didanosine by hydroxyurea against HIV [abstract I-124]. In: Program and abstracts of the 37th Interscience Conference on Antimicrobial Agents and Chemotherapy (Toronto). Washington, DC: American Society for Microbiology, **1997**:266.
60. Federici ME, Lupo S, Cahn P, et al. Hydroxyurea in combination regimens for the treatment of antiretroviral naive, HIV-infected adults [abstract 12235]. In: Conference record of the 12th World AIDS Conference. Geneva: Marathon Multimedia, **1998**:58.
